# Supplementary material for: High protein copy number is required to suppress stochasticity in the cyanobacterial circadian clock
Source: PubMed Central journal article supplement (PMC6070526; doi:10.1038/s41467-018-05109-4), 2018-08-01
Supplement: 41467_2018_5109_MOESM3_ESM.pdf [file 41467_2018_5109_MOESM3_ESM.pdf]

## Description of Additional Supplementary Files

File Name: Supplementary Movie 1

Description: Fluorescence microscope time-lapse movie showing wild type cells expressing EYFP-SsrA from the circadian *kaiBC* promoter. Scale bar 5  $\mu\text{m}$ .

File Name: Supplementary Movie 2

Description: Time-lapse movie showing the copy number tunable strain incubated in 1  $\mu\text{M}$  IPTG and 370  $\mu\text{M}$  theophylline. Scale bar 5  $\mu\text{m}$ .

File Name: Supplementary Movie 3

Description: Time-lapse movie showing the copy number tunable strain incubated in 1  $\mu\text{M}$  IPTG and 92  $\mu\text{M}$  theophylline. Scale bar 5  $\mu\text{m}$ .

File Name: Supplementary Movie 4

Description: Time-lapse movie showing the copy number tunable strain incubated in 1  $\mu\text{M}$  IPTG and 23  $\mu\text{M}$  theophylline. Scale bar 5  $\mu\text{m}$ .

File Name: Supplementary Data 1

Description: Kai protein copy number calculations.
